# Supplementary material for: Characterizing microbiota-independent effects of oligosaccharides on intestinal epithelial cells: insight into the role of structure and size
Source: Springer Nature journal article supplement (doi:10.1007/s00394-016-1234-9), 2016-06-13
Supplement: MOESM1 [file 10239490]

**Article title:** Characterizing microbiota-independent effects of oligosaccharides on intestinal epithelial cells: insight into the role of structure and size

**Journal name:** European Journal of Nutrition

**Authors:** Peyman Akbari, Johanna Fink-Gremmels, Rianne H.A.M. Willems, Elisabetta Difilippo, Henk A. Schols, Margriet H.C. Schoterman, Johan Garssen, Saskia Braber

**Corresponding author:**

Saskia Braber

Utrecht University, Yalelaan 104, 3584 CM Utrecht, The Netherlands

Phone: +31 30 2531078, Fax: +31 30 2535700

E-mail: S.braber@uu.nl

## Online Resource 1

### Characteristics of the applied oligosaccharides

| <b>Products</b> | <b>Dry matter</b> | <b>Oligosaccharides<br/>(wt % on DM)</b> | <b>Mono-and Di-saccharides<br/>(w/w)</b> | <b>DP</b> |
|-----------------|-------------------|------------------------------------------|------------------------------------------|-----------|
| <b>VGOS</b>     | 75%               | 59                                       | glucose, galactose, lactose: 41%         | 2-8       |
| <b>PGOS</b>     | >98%              | 97                                       | glucose, galactose, lactose: 3%          | 2-8       |
| <b>FOS</b>      | >98%              | 93.2                                     | glucose, fructose, sucrose: 6.8%         | 2-8       |
| <b>Inulin</b>   | >98%              | 96                                       | glucose, fructose, sucrose: 4%           | 2-60      |
