# Supplementary material for: Characterizing microbiota-independent effects of oligosaccharides on intestinal epithelial cells: insight into the role of structure and size
Source: Springer Nature journal article supplement (doi:10.1007/s00394-016-1234-9), 2016-06-13
Supplement: MOESM2 [file 10239490]

**Article title:** Characterizing microbiota-independent effects of oligosaccharides on intestinal epithelial cells: insight into the role of structure and size

**Journal name:** European Journal of Nutrition

**Authors:** Peyman Akbari, Johanna Fink-Gremmels, Rianne H.A.M. Willems, Elisabetta Difilippo, Henk A. Schols, Margriet H.C. Schoterman, Johan Garssen, Saskia Braber

**Corresponding author:**

Saskia Braber

Utrecht University, Yalelaan 104, 3584 CM Utrecht, The Netherlands

Phone: +31 30 2531078, Fax: +31 30 2535700

E-mail: S.braber@uu.nl

## Online Resource 2

Percentages of DP composition in VGOS

| <b>Compound</b>                 | <b>wt % (on DM)</b> |
|---------------------------------|---------------------|
| <b>Galacto-oligosaccharides</b> | 61.9                |
| <b>DP2 (including lactose)</b>  | 37.8                |
| <b>DP3</b>                      | 22.0                |
| <b>DP4</b>                      | 10.8                |
| <b>DP5</b>                      | 4.8                 |
| <b>DP6 and higher</b>           | 2.3                 |
| <b>Lactose in DP2</b>           | 15.8                |
| <b>Glucose</b>                  | 20.7                |
| <b>Galactose</b>                | 1.1                 |
| <b>Total</b>                    | 99.5%               |
